# Supplementary material for: Sex and Age Differences in a Progressive Synucleinopathy Mouse Model
Source: MDPI journal article supplement (doi:10.3390/biom13060977), 2023-06-11
Supplement: s1 [file s1]

## *Supplementary Material*

**Table S1. Primary and secondary antibodies**

| <b>Primary antibodies</b>   | <b>Host</b> | <b>Company</b>       | <b>Catalog #</b> | <b>Dilution</b> |
|-----------------------------|-------------|----------------------|------------------|-----------------|
| Human $\alpha$ -Synuclein   | Rabbit      | Abcam                | Ab138501         | 1/500           |
| DAT                         | Rat         | Millipore            | MAB369           | 1/250           |
| GFAP                        | Rabbit      | Dako                 | Z0334            | 1/500           |
| Iba1                        | Goat        | Novus Biological     | NB100-1028       | 1/1000          |
| TH                          | Sheep       | Abcam                | Ab113            | 1/200           |
| <b>Secondary antibodies</b> | <b>Host</b> | <b>Company</b>       | <b>Catalog #</b> | <b>Dilution</b> |
| Anti-Goat Alexafluor 633    | Donkey      | Life Technologies    | A21082           | 1/1000          |
| Anti-Rabbit Alexafluor 488  | Donkey      | Life Technologies    | A21206           | 1/1000          |
| Anti-Rat Texas Red          | Donkey      | LifeSpan Biosciences | LS-C61063-2000   | 1/1000          |
| Anti-Sheep Cy3              | Donkey      | Millipore            | AP184C           | 1/800           |

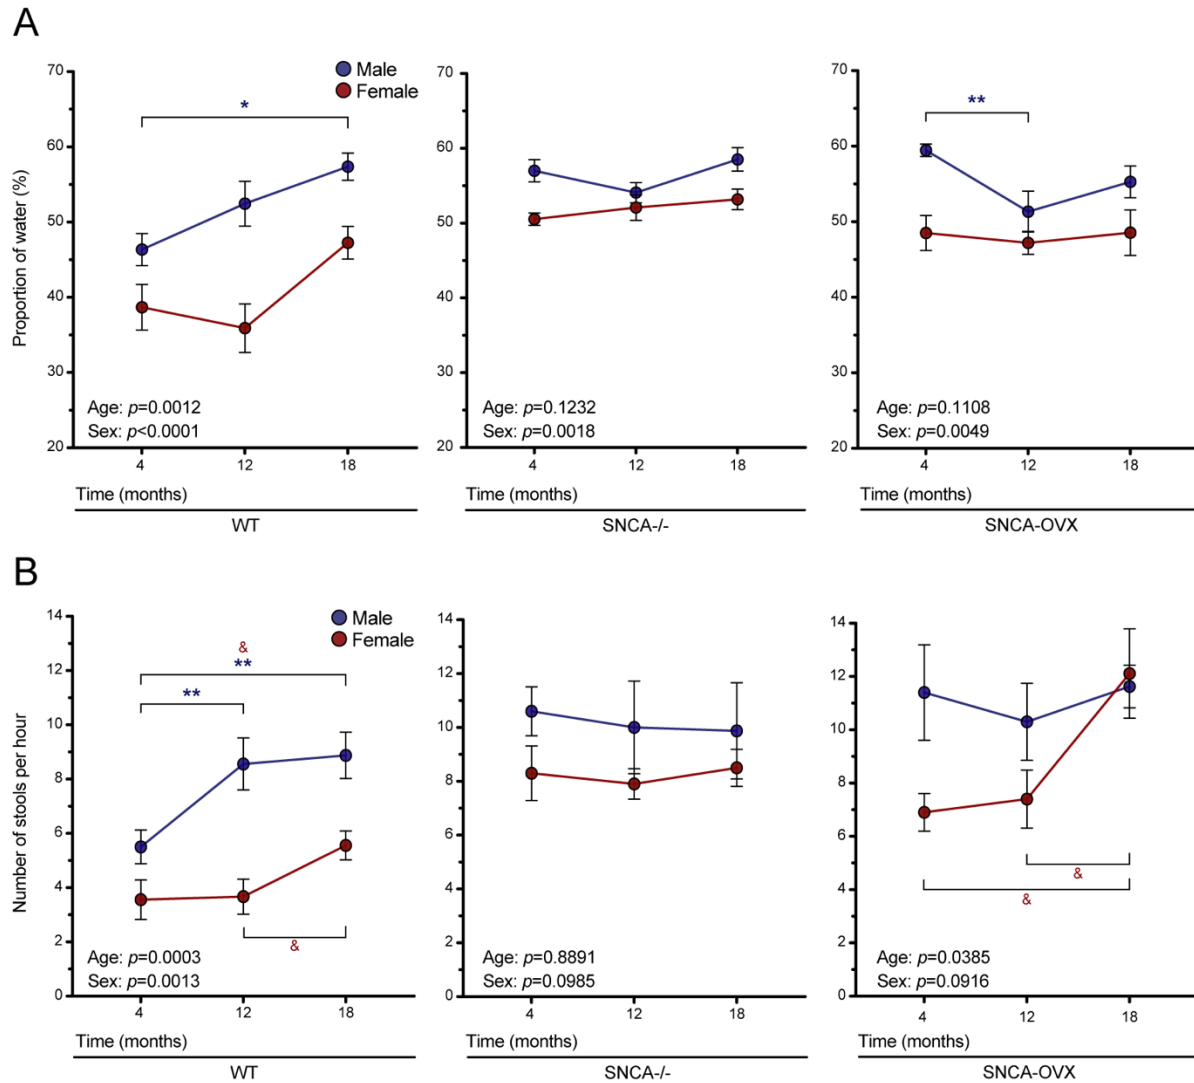

**Figure S1. Sex differences in the efficiency of stool excretion.** **A.** Analysis of the proportion of water in feces of mice reveals that male excretes a higher level of fluid than female mice for all genotypes. **B.** The count of stools per hour shows that wildtype male and SNCA-OVX female mice have a faster increase of fecal excretion than the opposite sex. Each group included 8-10 mice. Tukey's post-hoc tests: (Male)  $*p < 0.05$ ,  $**p < 0.01$ ; (Female)  $\&p < 0.05$ . **Abbreviations:** WT, wildtype.

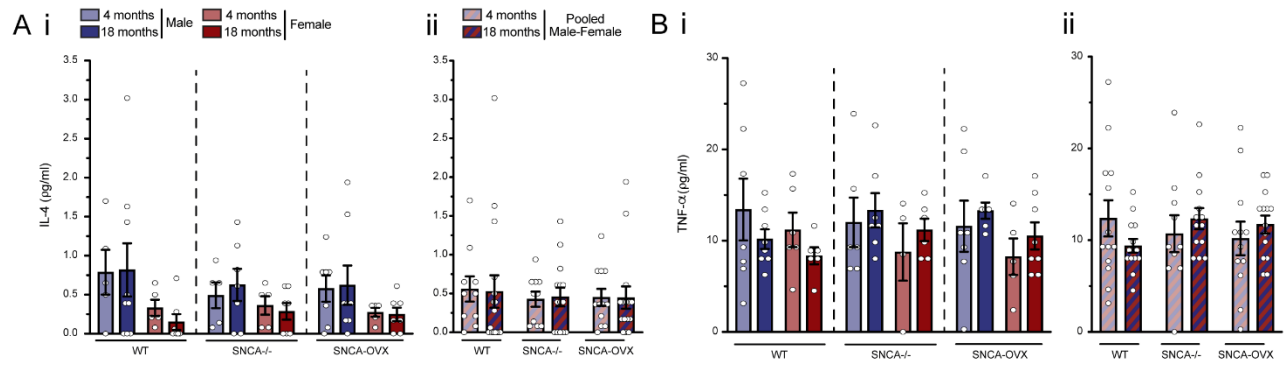

**Figure S2. Aging and aSyn have no effect on IL-4 and TNF- $\alpha$  levels. A-B.** Plasma analysis of IL-4 (A) and TNF- $\alpha$  (B) reveals non-significant change with aging or between animal models. Although IL-4 appears higher in male than female, no sexual differences were found. Each group included 7-10 mice. **Abbreviations:** IL, interleukin; TNF- $\alpha$ , tumor necrosis factor alpha; WT, wildtype.
